# Supplementary material for: Enhancement of ORR catalytic activity by multiple heteroatom-doped carbon materials
Source: Royal Society of Chemistry journal article supplement (doi:10.1039/c4cp03868a), 2014-10-09
Supplement: c4cp03868a1.pdf [file c4cp03868a1.pdf]

## Supporting Information

### Enhancement of ORR Catalytic Activity by Multiple Hetero-atom Doped Carbon Materials

*Dae-wook Kim,<sup>a</sup> Oi Lun Li,<sup>b</sup> and Nagahiro Saito<sup>abc\*</sup>*

<sup>a</sup>Department of Materials, Physics and Energy Engineering, Nagoya University, Furo-cho, Chikusa-ku, Nagoya 464-8603, Japan

<sup>b</sup>Green Mobility Collaborative Research Center, Nagoya University, Furo-cho, Chikusa-ku, Nagoya 464-8603, Japan

<sup>c</sup>EcoTopia Science Institute, Nagoya University, Furo-cho, Chikusa-ku, Nagoya 464-8603, Japan

E-mail: hiro@rd.numse.nagoya-u.ac.jp

Telephone/fax: +81-52-789-3177

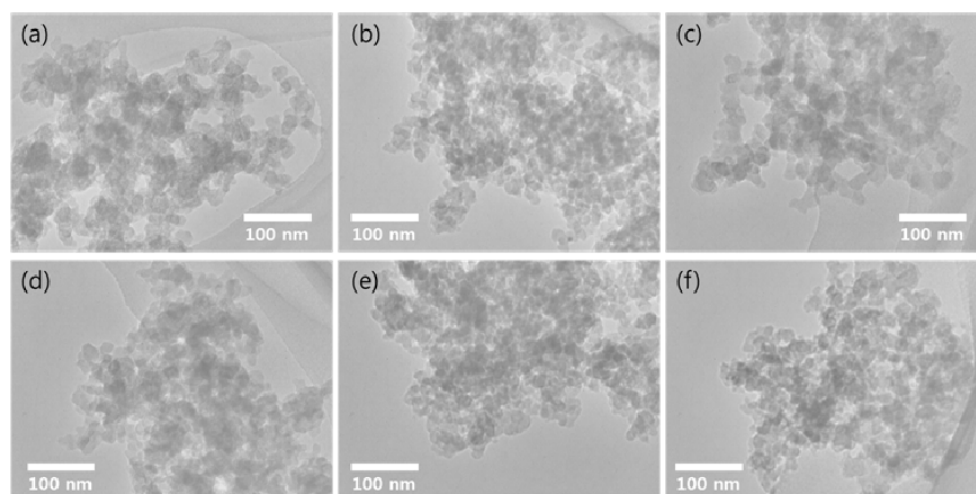

Fig. S1. TEM images of synthesized carbon nanoparticles (a) CNS, (b) NCNS, (c) BCNS, (d) PCNS, (e) BNCNS, (f) PNCNS. ; All synthesized particles have spherical morphology with uniform size (20~30 nm) and it became an agglomeration structure.

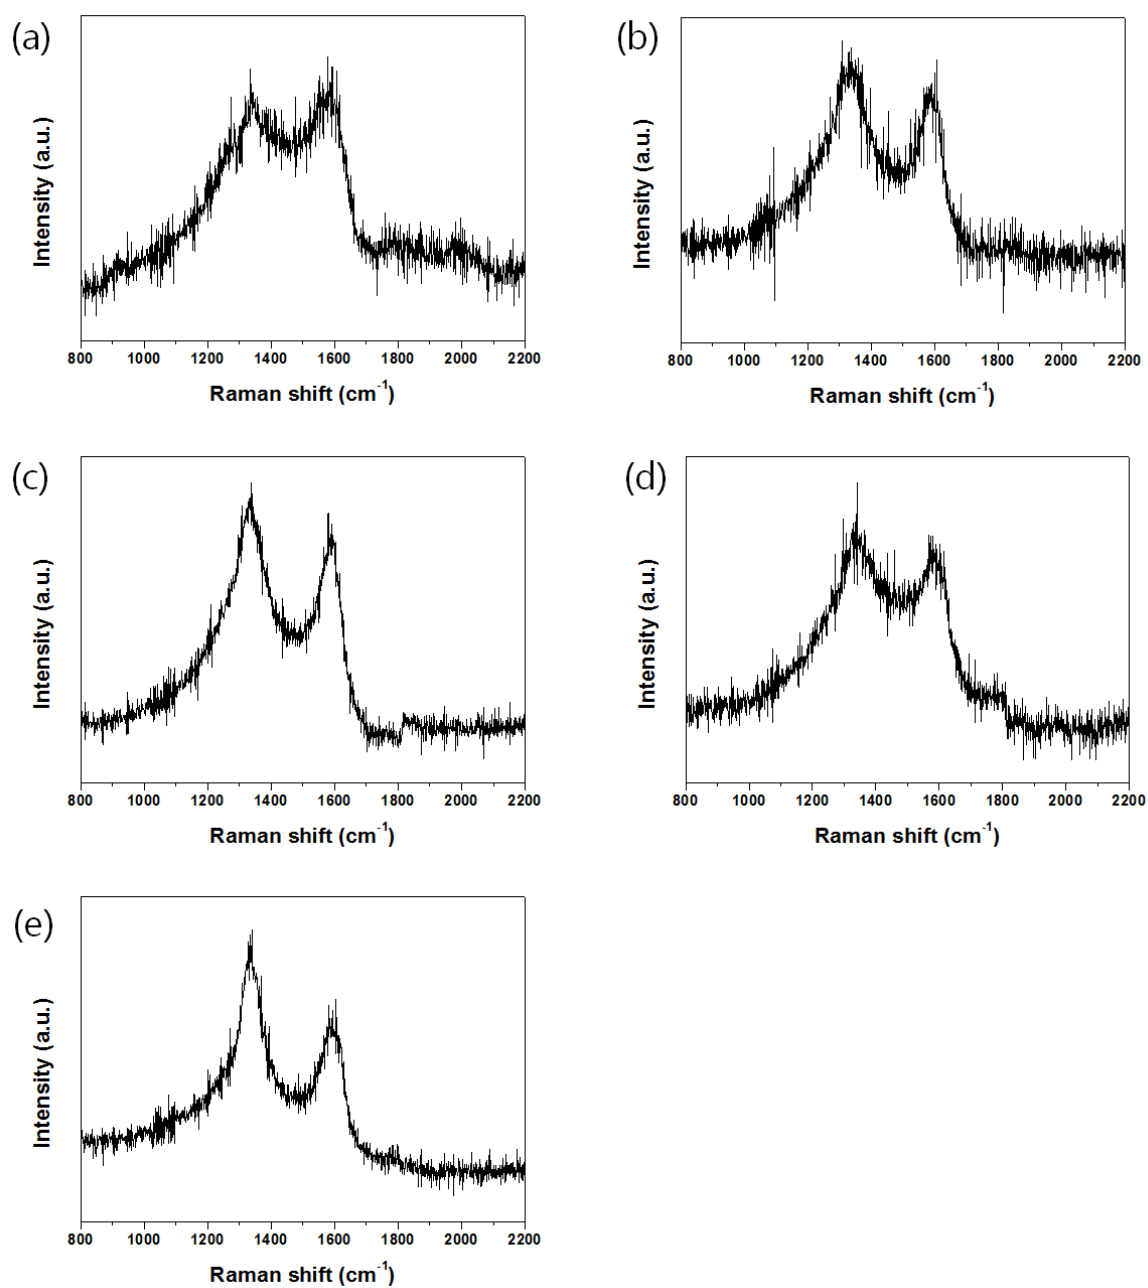

Fig. S2. Raman spectra of hetero-atom doped carbon nanoparticles.  
(a) CNS, (b) BCNS, (c) PCNS, (d) BNCNS, (e) PNCNS.

Table S1. Chemical compositions and doping concentrations of the sample obtained from the XPS analysis.

|       | Chemical compositions (at%) |     |     |     |     | Doping concentrations |      |      |      |
|-------|-----------------------------|-----|-----|-----|-----|-----------------------|------|------|------|
|       | C                           | N   | O   | P   | B   | O/C                   | N/C  | P/C  | B/C  |
| NCNS  | 93.4                        | 3.0 | 3.6 | -   | -   | 3.85                  | 3.21 | -    | -    |
| BCNS  | 95.3                        | -   | 3.3 | -   | 1.4 | 3.46                  | -    | -    | 1.47 |
| PCNS  | 95.5                        | -   | 3.9 | 0.6 | -   | 4.08                  | -    | 0.63 | -    |
| BNCNS | 90                          | 4.0 | 3.7 | -   | 1.9 | 4.11                  | 4.44 | -    | 2.11 |
| PNCNS | 87.3                        | 3.8 | 7.5 | 1.4 | -   | 8.59                  | 4.35 | 1.60 | -    |

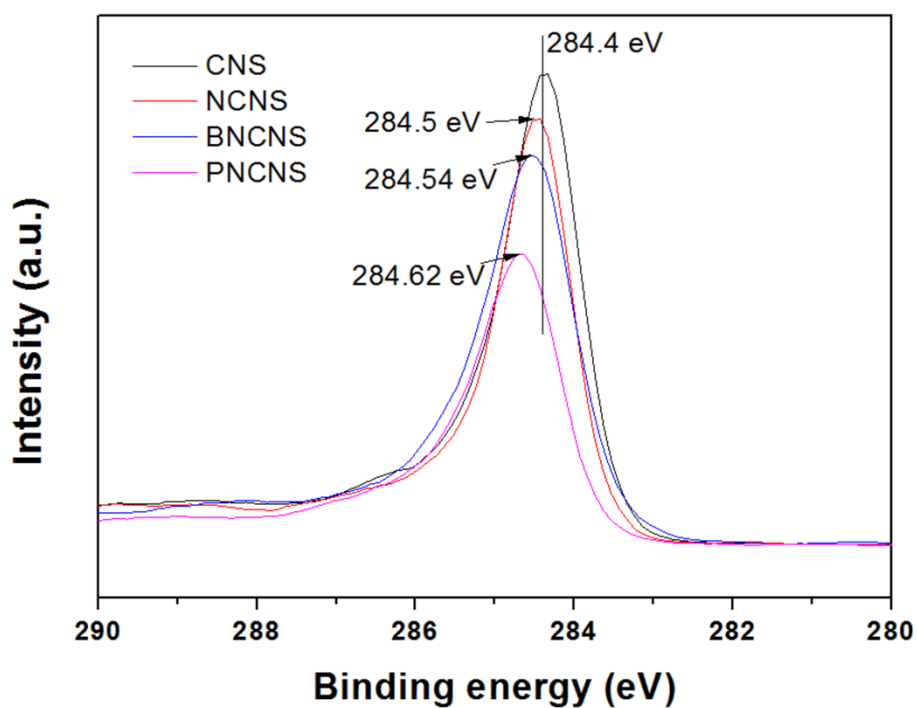

Fig. S3. C1s spectra of hetero-atom doped carbon nanoparticles

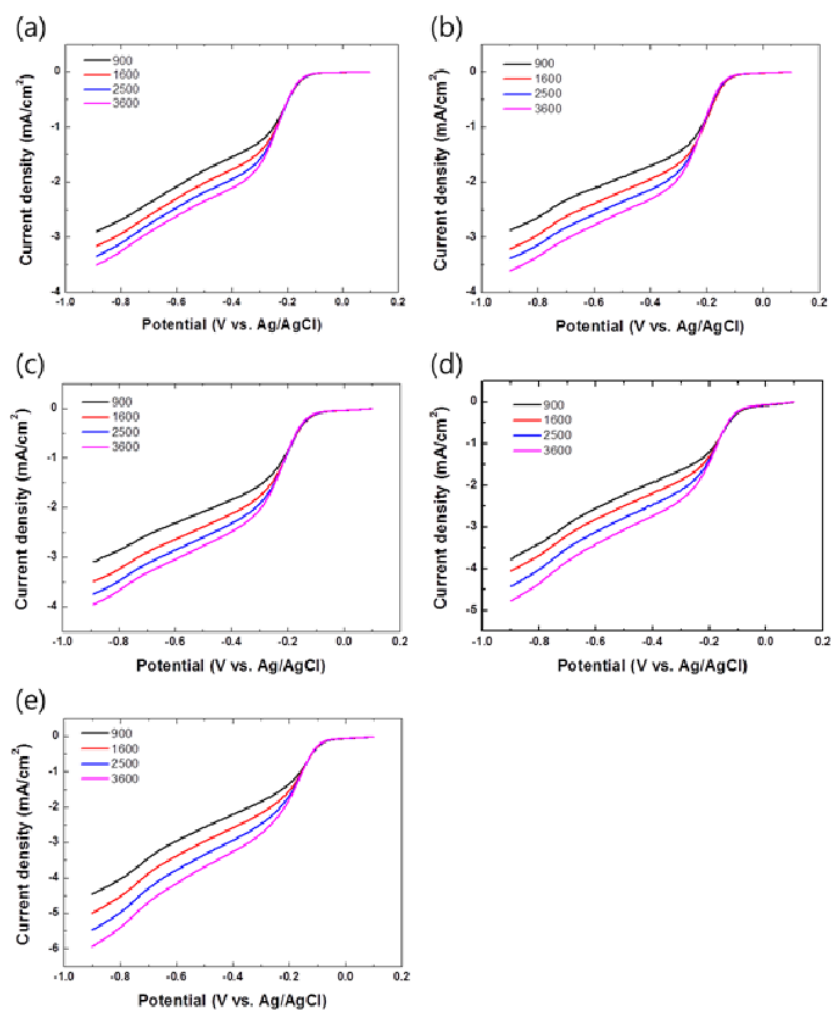

Fig. S4. Linear sweep voltammetry of hetero-atom doped carbons at various rotation speed (a) BCNS, (b) PCNS, (c) NCNS, (d) BNCNS, (e) PNCNS.
